# Supplementary material for: Key residues in the VDAC2-BAK complex can be targeted to modulate apoptosis
Source: PubMed Central journal article supplement (PMC11098506; doi:10.1371/journal.pbio.3002617), 2024-05-02

**Fig. 2C top**

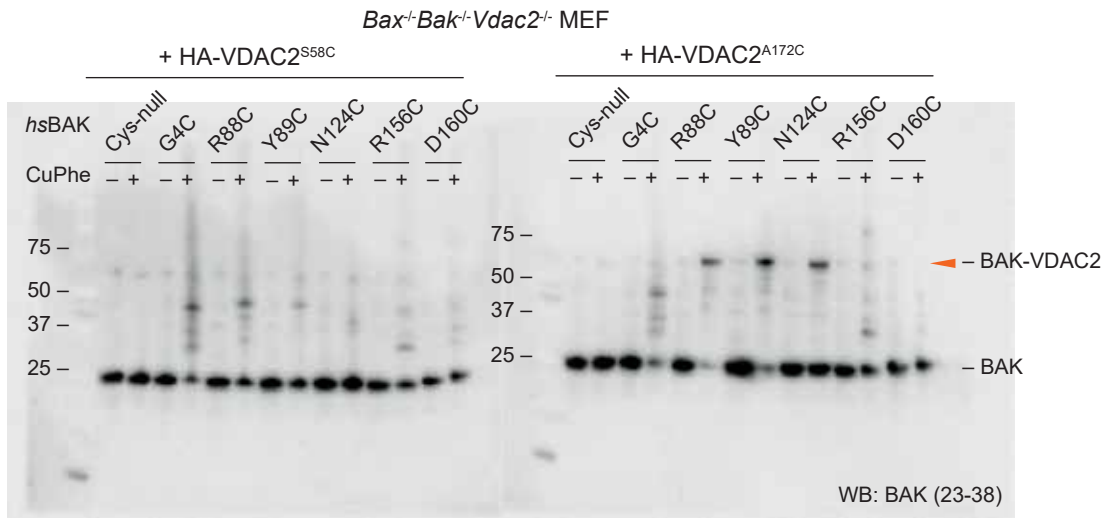

**Fig. 2C bottom**

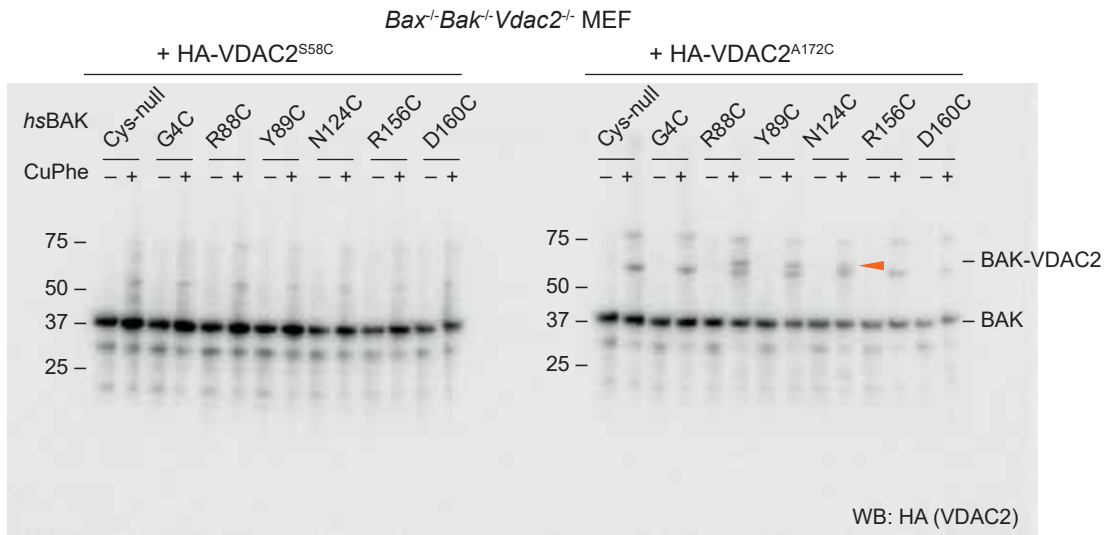

**Fig. 2D top**

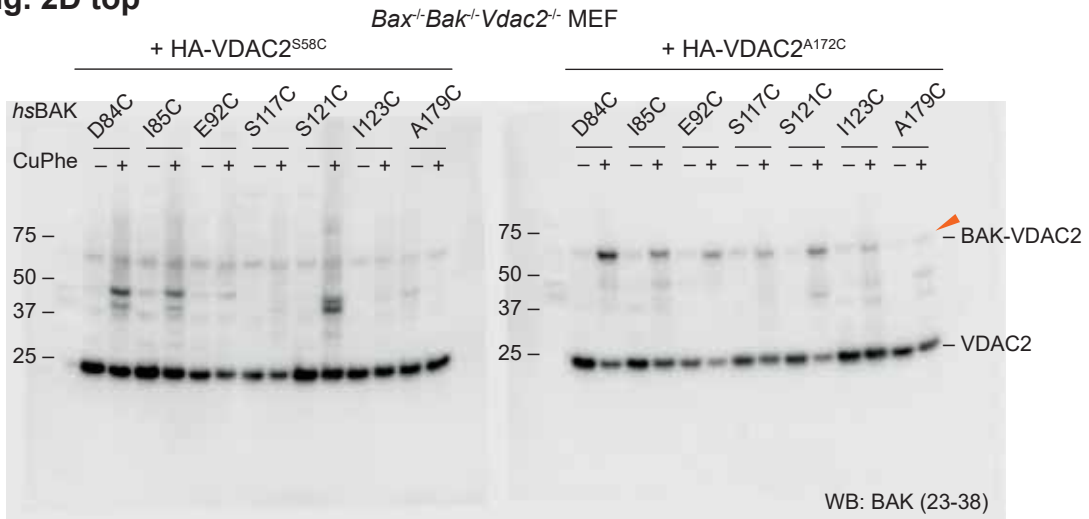

**Fig. 2D bottom**

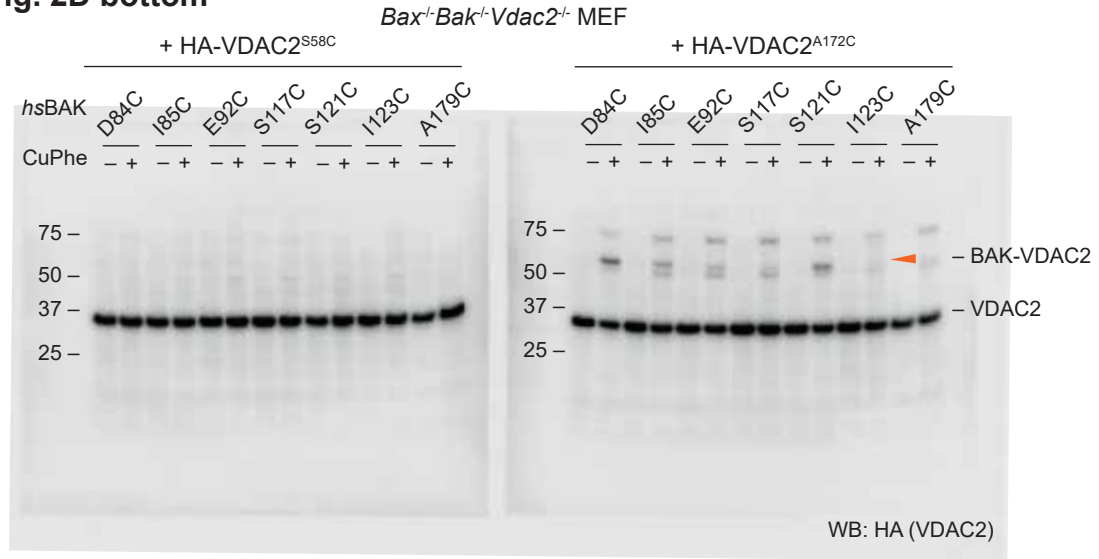

**Fig. 4A**

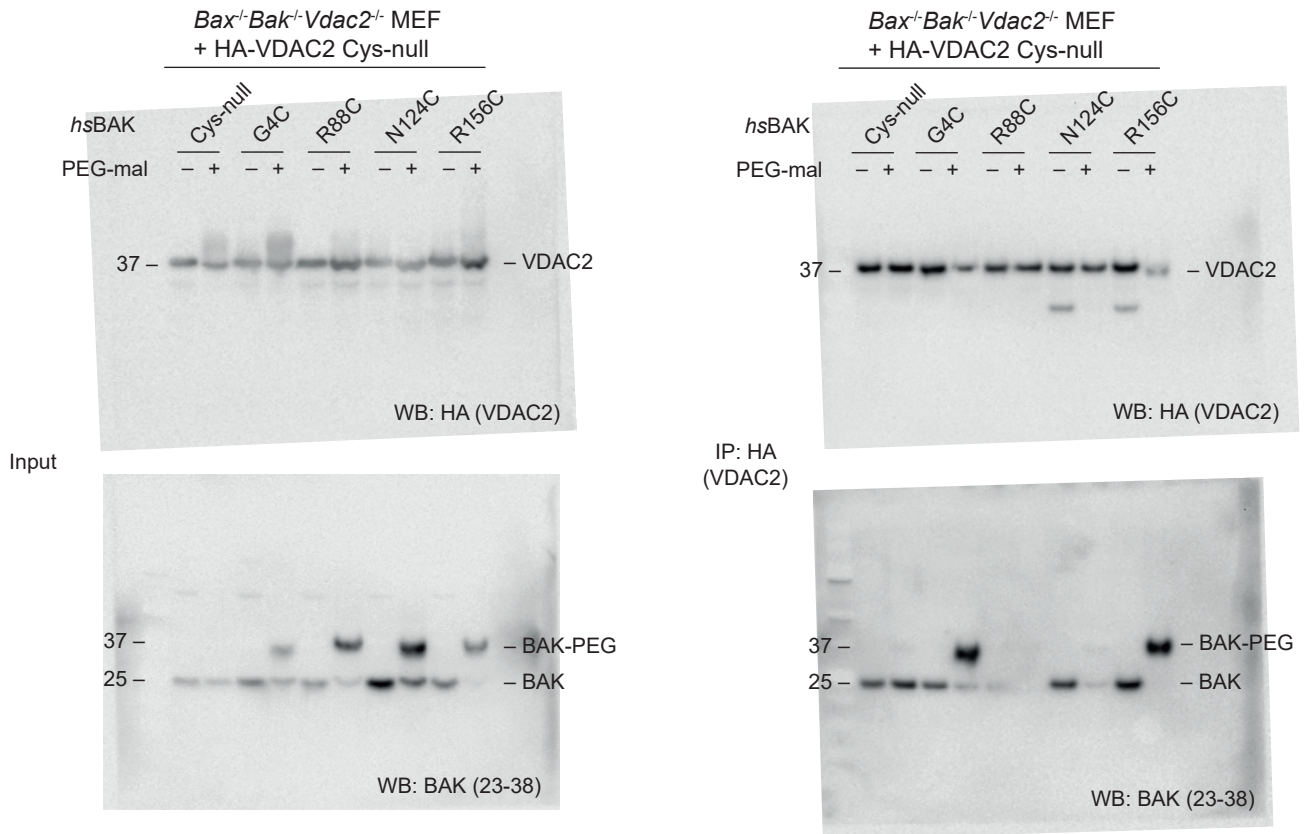

**Fig. 4B**

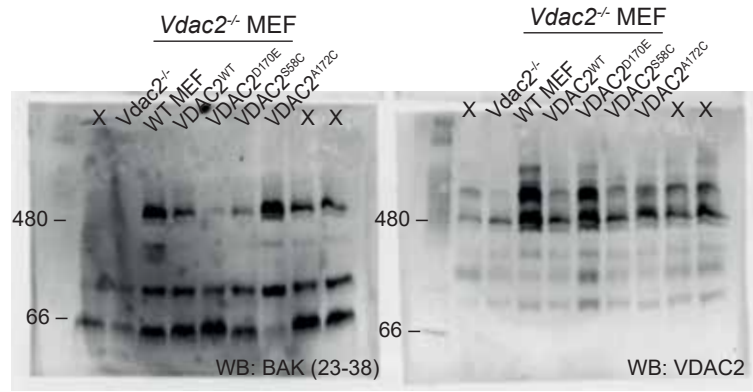

**Fig. 4C**

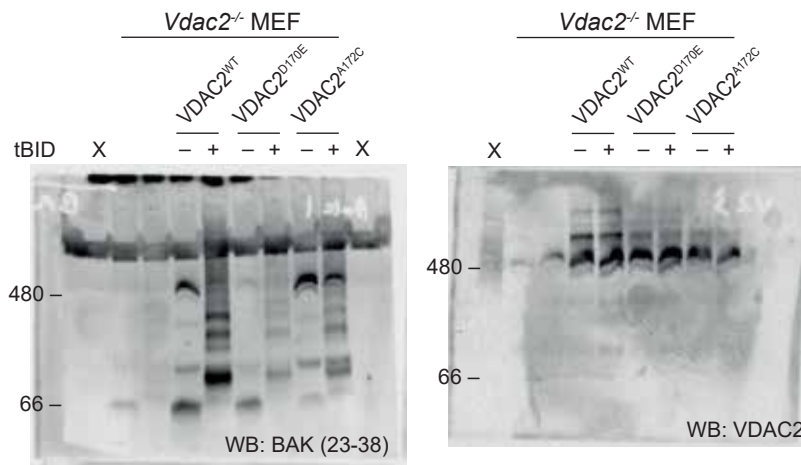

**Fig. 4D**

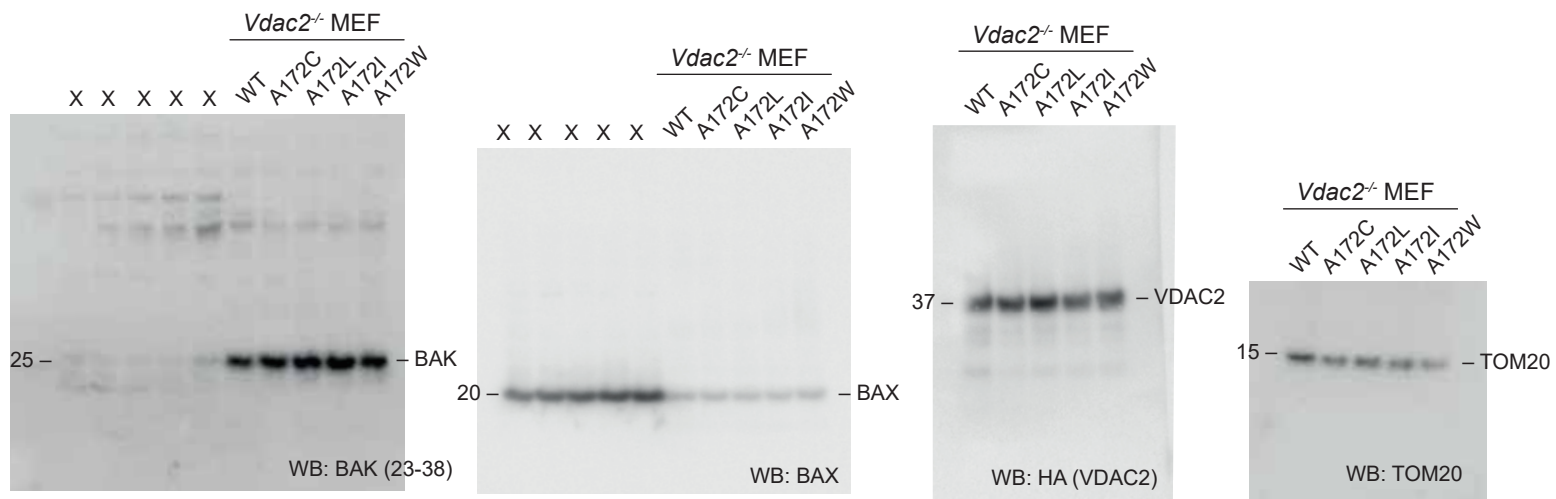

**Fig. 4E**

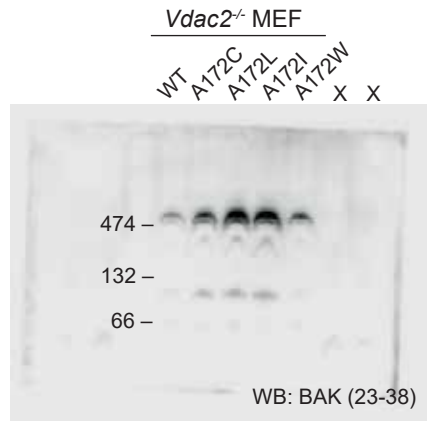

**Fig. 4F**

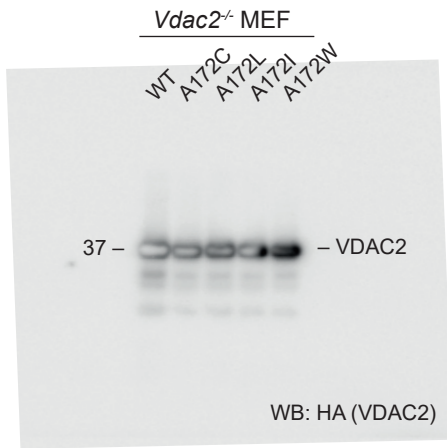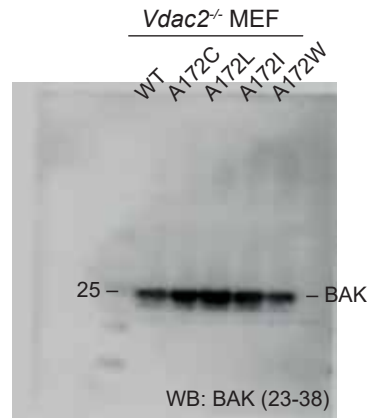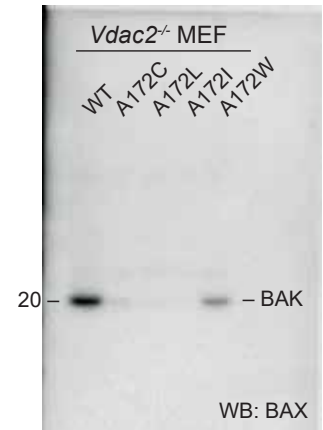

**Fig. 4G**

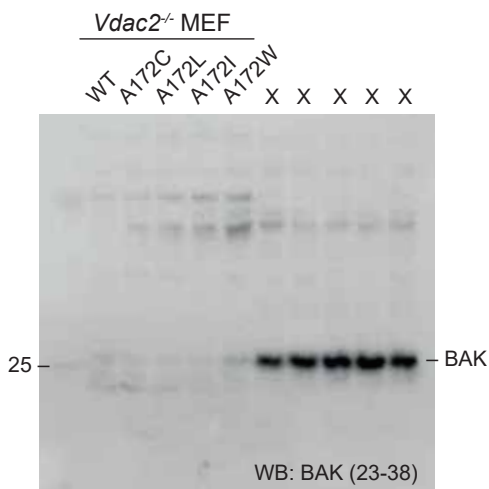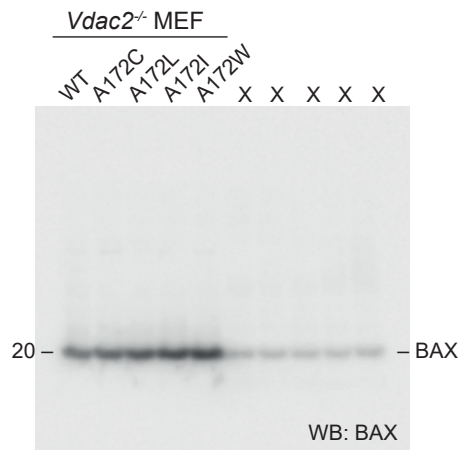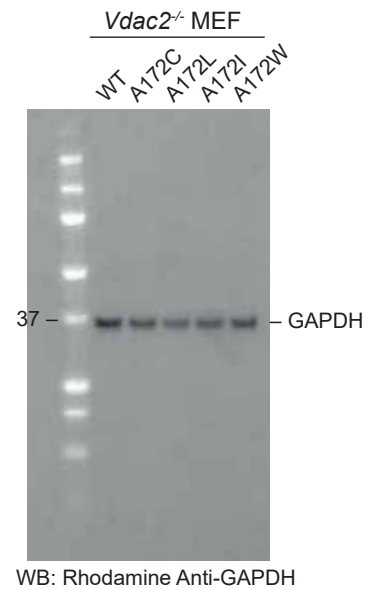

**Fig. 4H**

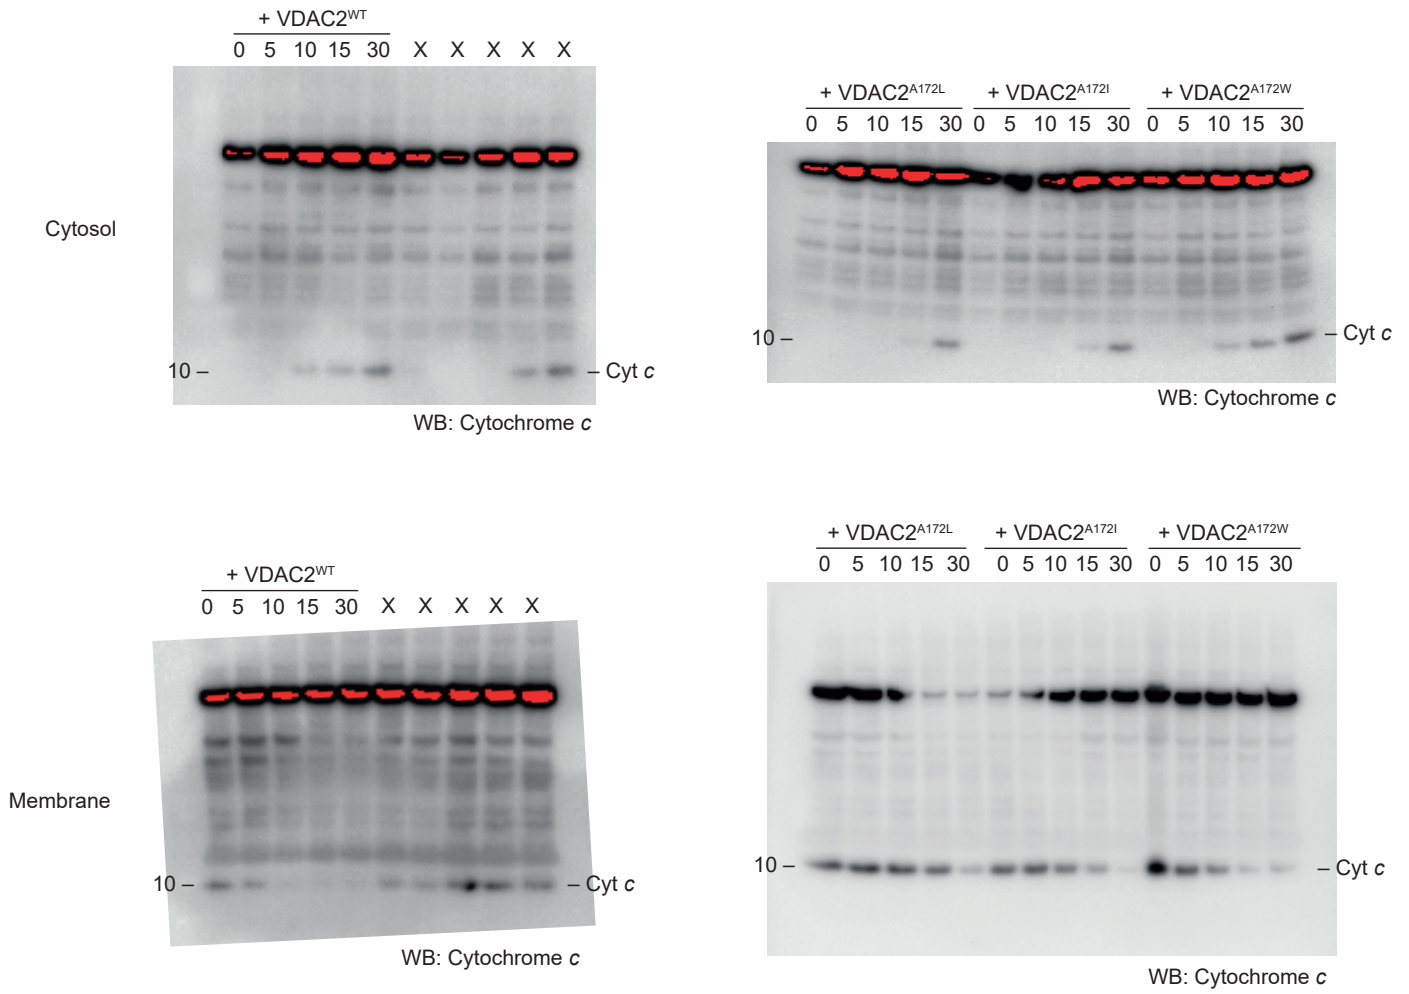

**Fig. S1A**

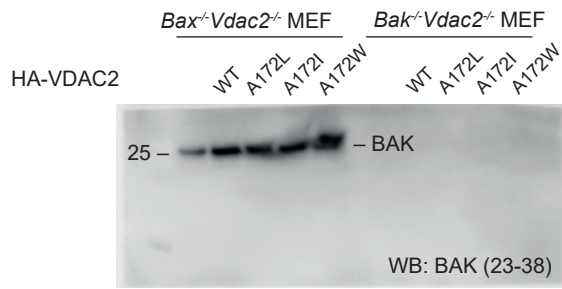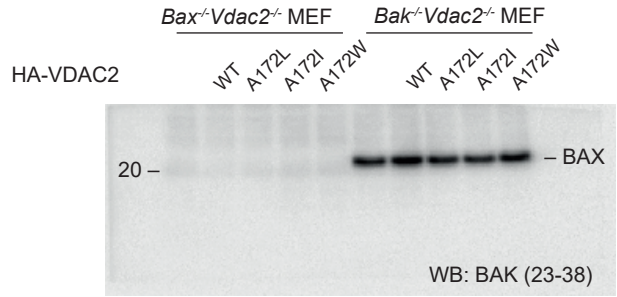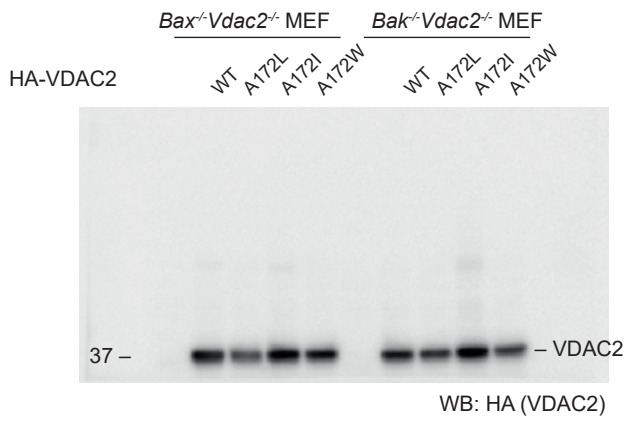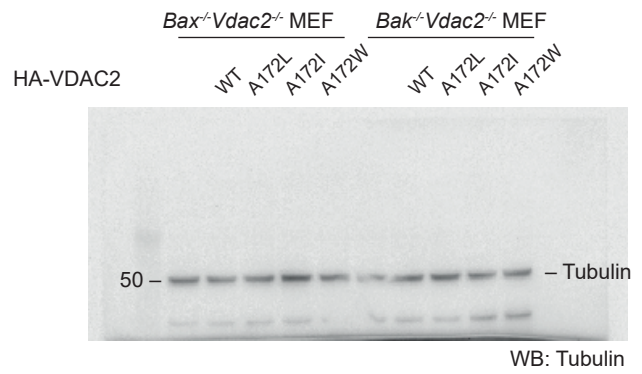

**Fig. S1B**

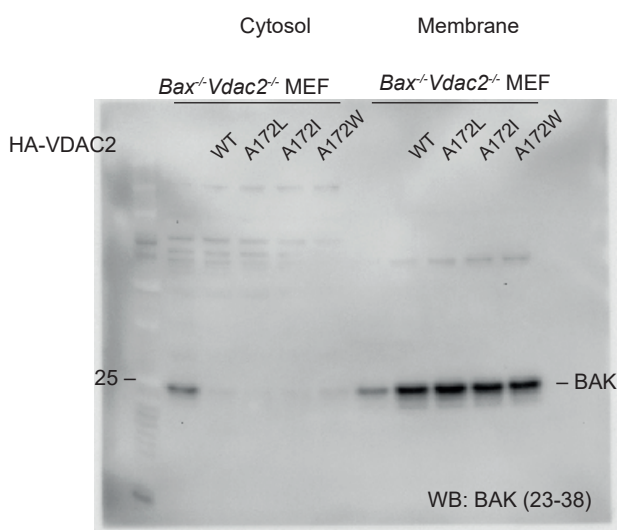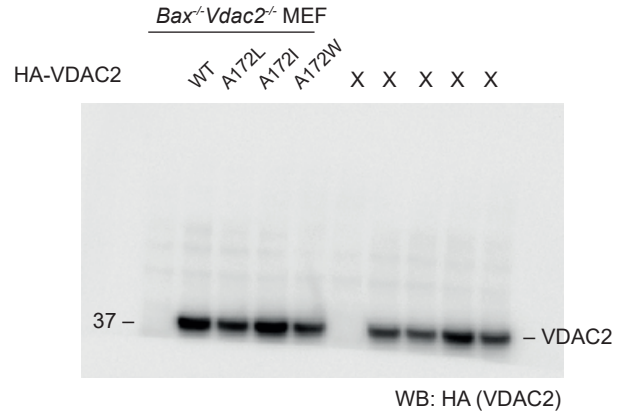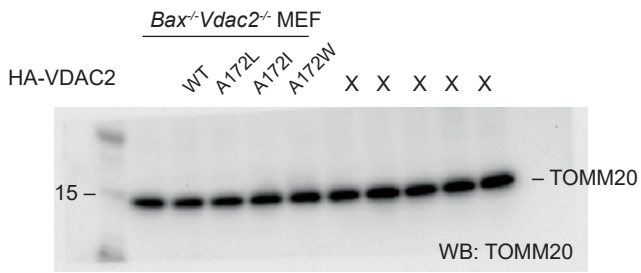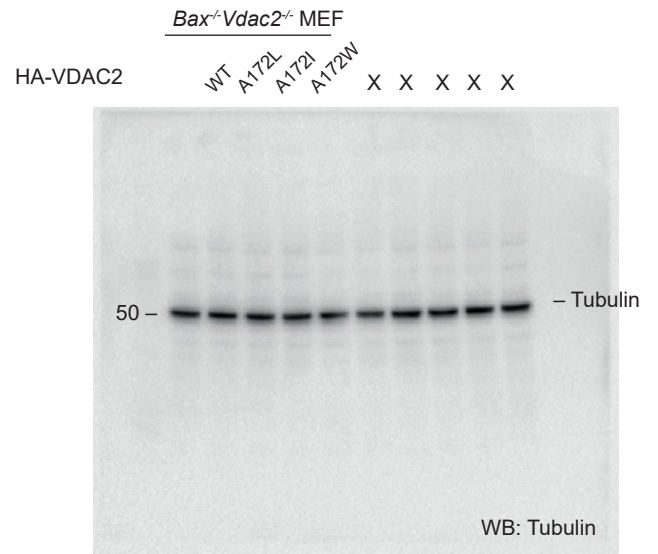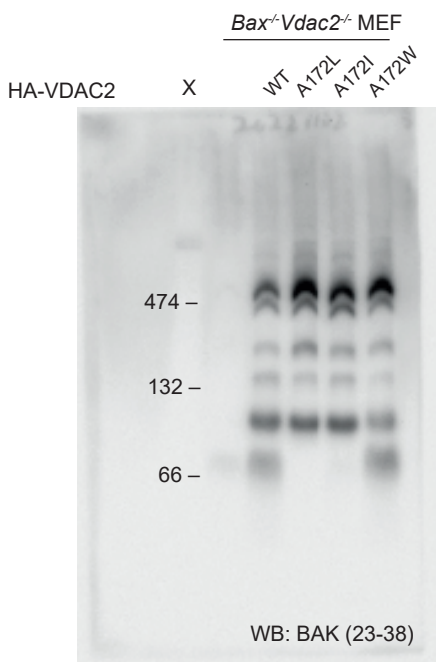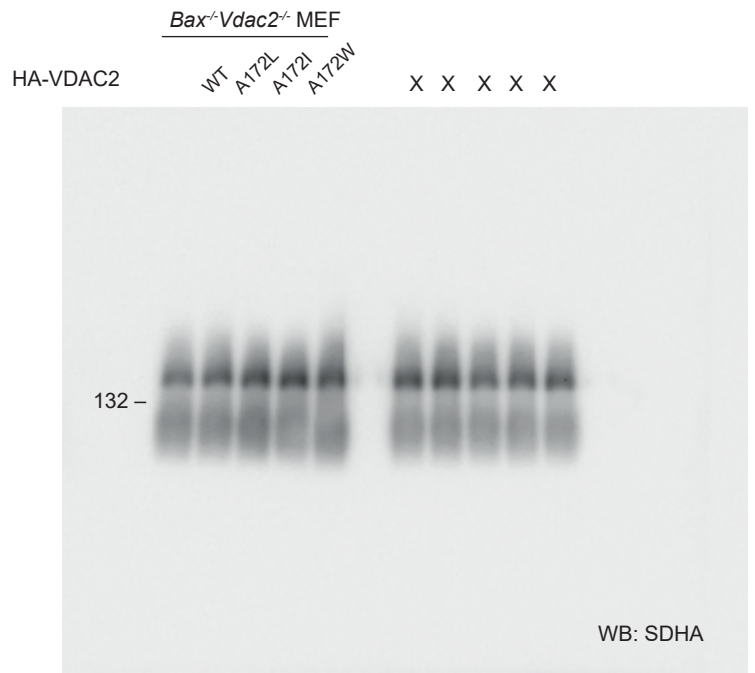

Supplement: pbio.3002617.s008.pdf [file pbio.3002617.s008.pdf]
